# Supplementary material for: Shear modulus data for the human lens determined from a spinning lens test
Source: PubMed Central journal article supplement (PMC3405528; doi:10.1016/j.exer.2012.01.011), 2012-04
Supplement: mmc2.pdf [file mmc2.pdf]

**Table S.1** – Lenses received during preliminary tests.

| <b>Oxford label</b> | <b>sex</b> | <b>age (years)</b> | <b>Oxford label</b> | <b>sex</b> | <b>age (years)</b> |
|---------------------|------------|--------------------|---------------------|------------|--------------------|
| L001A               | M          | 23                 | L011A               | M          | 87                 |
| L001B               | M          | 23                 | L011B               | M          | 87                 |
| L002A               | M          | 35                 | L012A               | M          | 52                 |
| L002B               | M          | 35                 | L012B               | M          | 52                 |
| L003A               | F          | 74                 | L013A               | M          | 76                 |
| L003B               | F          | 74                 | L013B               | M          | 76                 |
| L004A               | F          | 56                 | L014A               | M          | 66                 |
| L004B               | F          | 56                 | L014B               | M          | 66                 |
| L005A               | F          | 64                 | L015A               | M          | 68                 |
| L005B               | F          | 64                 | L015B               | M          | 68                 |
| L006A               | M          | 65                 | L016A               | M          | 22                 |
| L006B               | M          | 65                 | L016B               | M          | 22                 |
| L007A               | F          | 17                 | L017A               | M          | 53                 |
| L007B               | F          | 17                 | L017B               | M          | 53                 |
| L008A               | M          | 43                 | L018A               | M          | 47                 |
| L008B               | M          | 43                 | L018B               | M          | 47                 |
| L009A               | F          | 59                 | L019A               | M          | 54                 |
| L009B               | F          | 59                 | L019B               | M          | 54                 |
| L010A               | M          | 61                 |                     |            |                    |

*Generated on the 25th of February 2012.*

**Table S.2** – The lenses received for the main spinning lens tests. Aspect ratios were not calculated for lenses L020B, L025B, and L058B because they were damaged or had absent capsules when received. The table continues over four pages.

| Oxford label | sex | age (years) | time since death (days)                     | aspect ratio, $\alpha$ | set $\mathcal{G}$ | swelling | damage | fluid |
|--------------|-----|-------------|---------------------------------------------|------------------------|-------------------|----------|--------|-------|
| L020A        | F   | 25          | <i>not tested due to absence of capsule</i> |                        |                   |          |        |       |
| L020B        | F   | 25          | 2 22:25                                     | –                      |                   |          | •      |       |
| L021A        | F   | 40          | 2 14:42                                     | 2.324                  | •                 |          |        |       |
| L021B        | F   | 40          | 2 16:12                                     | 2.289                  |                   |          |        | •     |
| L022A        | M   | 26          | 2 14:20                                     | 1.853                  |                   | •        |        | •     |
| L022B        | M   | 26          | 2 15:01                                     | 1.950                  | •                 |          |        |       |
| L023A        | M   | 49          | 1 22:09                                     | 2.756                  |                   |          | •      |       |
| L023B        | M   | 49          | <i>not tested due to damage</i>             |                        |                   |          |        |       |
| L024A        | M   | 63          | 2 03:35                                     | 1.819                  |                   | •        | •      |       |
| L024B        | M   | 63          | 2 04:42                                     | 1.879                  |                   | •        |        |       |
| L025A        | M   | 37          | <i>not tested due to absence of capsule</i> |                        |                   |          |        |       |
| L025B        | M   | 37          | 3 09:33                                     | –                      |                   |          | •      |       |
| L026A        | F   | 30          | 1 12:38                                     | 1.895                  |                   | •        |        |       |
| L026B        | F   | 30          | 1 13:37                                     | 1.880                  |                   | •        |        | •     |
| L027A        | M   | 46          | 2 15:14                                     | 2.264                  | •                 |          |        |       |
| L027B        | M   | 46          | 3 21:01                                     | 2.271                  | •                 |          |        |       |
| L028A        | M   | 31          | 2 15:10                                     | 2.325                  |                   |          | •      |       |
| L028B        | M   | 31          | 2 18:00                                     | 2.212                  |                   |          | •      |       |
| L029A        | M   | 49          | 2 17:19                                     | 2.206                  | •                 |          |        |       |
| L029B        | M   | 49          | 3 19:08                                     | 2.184                  | •                 |          |        |       |

**Table S.2** – (Part ii, continued from previous page.)

| <b>Oxford label</b> | <b>sex</b> | <b>age (years)</b> | <b>time since death (days)</b>             | <b>aspect ratio, <math>\alpha</math></b> | <b>set <math>\mathcal{G}</math></b> | <b>swelling</b> | <b>damage</b> | <b>fluid</b> |
|---------------------|------------|--------------------|--------------------------------------------|------------------------------------------|-------------------------------------|-----------------|---------------|--------------|
| L030A               | M          | 58                 | 2 12:20                                    | 2.306                                    |                                     |                 |               | •            |
| L030B               | M          | 58                 | 2 13:36                                    | 2.264                                    | •                                   |                 |               |              |
| L031A               | M          | 21                 | 2 16:31                                    | 2.152                                    |                                     |                 | •             | •            |
| L031B               | M          | 21                 | 2 19:25                                    | 2.122                                    |                                     |                 |               | •            |
| L032A               | F          | 45                 | 2 13:49                                    | 1.514                                    |                                     | •               | •             |              |
| L032B               | F          | 45                 | 2 15:06                                    | 1.910                                    |                                     | •               | •             |              |
| L033A               | F          | 19                 | 2 09:08                                    | 1.794                                    | •                                   |                 |               |              |
| L033B               | F          | 19                 | 2 10:07                                    | 1.846                                    |                                     |                 |               | •            |
| L034A               | M          | 43                 | <i>not tested due to absence of author</i> |                                          |                                     |                 |               |              |
| L034B               | M          | 43                 | "                                          |                                          |                                     |                 |               |              |
| L035A               | M          | 65                 | "                                          |                                          |                                     |                 |               |              |
| L035B               | M          | 65                 | "                                          |                                          |                                     |                 |               |              |
| L036A               | M          | 53                 | "                                          |                                          |                                     |                 |               |              |
| L036B               | M          | 53                 | "                                          |                                          |                                     |                 |               |              |
| L037A               | M          | 12                 | 1 22:40                                    | 1.944                                    | •                                   |                 |               |              |
| L037B               | M          | 12                 | 1 23:40                                    | 1.949                                    |                                     |                 |               | •            |
| L038A               | F          | 33                 | 4 14:11                                    | 2.246                                    | •                                   |                 |               |              |
| L038B               | F          | 33                 | 4 17:11                                    | 2.256                                    |                                     |                 |               | •            |
| L039A               | M          | 43                 | 4 03:55                                    | 2.167                                    |                                     |                 | •             |              |
| L039B               | M          | 43                 | 4 04:55                                    | 2.255                                    | •                                   |                 |               |              |

**Table S.2** – (Part iii, continued from previous page.)

| <b>Oxford label</b> | <b>sex</b> | <b>age (years)</b> | <b>time since death (days)</b> | <b>aspect ratio, <math>\alpha</math></b> | <b>set <math>\mathcal{G}</math></b> | <b>swelling</b> | <b>damage</b> | <b>fluid</b> |
|---------------------|------------|--------------------|--------------------------------|------------------------------------------|-------------------------------------|-----------------|---------------|--------------|
| L040A               | M          | 23                 | 4 00:43                        | 1.980                                    | •                                   |                 |               |              |
| L040B               | M          | 23                 | 4 01:38                        | 1.926                                    | •                                   |                 |               |              |
| L041A               | M          | 39                 | 3 01:21                        | 1.913                                    |                                     | •               | •             |              |
| L041B               | M          | 39                 | 3 02:21                        | 2.003                                    |                                     |                 | •             |              |
| L042A               | M          | 40                 | 2 18:27                        | 1.905                                    |                                     | •               |               |              |
| L042B               | M          | 40                 | 2 19:42                        | 1.917                                    |                                     | •               |               |              |
| L043A               | M          | 12                 | 2 16:05                        | 1.828                                    | •                                   |                 |               |              |
| L043B               | M          | 12                 | 2 16:55                        | 1.741                                    | •                                   |                 |               |              |
| L044A               | F          | 44                 | 3 14:38                        | 2.111                                    |                                     |                 | •             |              |
| L044B               | F          | 44                 | 3 16:08                        | 2.156                                    | •                                   |                 |               |              |
| L045A               | M          | 45                 | 3 04:20                        | 1.870                                    |                                     | •               |               | •            |
| L045B               | M          | 45                 | 3 07:45                        | 1.828                                    |                                     | •               | •             |              |
| L046A               | F          | 58                 | 3 06:48                        | 1.923                                    |                                     | •               | •             |              |
| L046B               | F          | 58                 | 3 08:38                        | 1.896                                    |                                     | •               | •             |              |
| L047A               | M          | 43                 | 2 16:55                        | 2.322                                    |                                     |                 |               | •            |
| L047B               | M          | 43                 | 2 20:20                        | 2.337                                    | •                                   |                 |               |              |
| L048A               | M          | 48                 | 2 21:43                        | 2.046                                    |                                     |                 |               | •            |
| L048B               | M          | 48                 | 3 00:51                        | 2.157                                    |                                     |                 |               | •            |
| L049A               | M          | 60                 | 2 07:53                        | 1.829                                    |                                     | •               |               | •            |
| L049B               | M          | 60                 | 2 09:15                        | 1.821                                    |                                     | •               | •             |              |

**Table S.2** – (Part iv, continued from previous page.)

| <b>Oxford label</b> | <b>sex</b> | <b>age (years)</b> | <b>time since death (days)</b> | <b>aspect ratio, <math>\alpha</math></b> | <b>set <math>\mathcal{G}</math></b> | <b>swelling</b> | <b>damage</b> | <b>fluid</b> |
|---------------------|------------|--------------------|--------------------------------|------------------------------------------|-------------------------------------|-----------------|---------------|--------------|
| L050A               | F          | 48                 | 2 08:27                        | 2.178                                    | •                                   |                 |               |              |
| L050B               | F          | 48                 | 2 09:23                        | 2.176                                    | •                                   |                 |               |              |
| L051A               | M          | 40                 | 3 02:36                        | 2.057                                    | •                                   |                 |               |              |
| L051B               | M          | 40                 | 3 03:41                        | 1.934                                    |                                     | •               |               | •            |
| L052A               | F          | 34                 | 2 18:20                        | 1.873                                    |                                     | •               |               |              |
| L052B               | F          | 34                 | 2 21:23                        | 2.260                                    | •                                   |                 |               |              |
| L053A               | F          | 56                 | 2 17:13                        | 2.055                                    | •                                   |                 |               |              |
| L053B               | F          | 56                 | 3 09:41                        | 1.988                                    |                                     |                 | •             |              |
| L054A               | M          | 52                 | 3 12:12                        | 2.006                                    | •                                   |                 |               |              |
| L054B               | M          | 52                 | 4 01:19                        | 1.995                                    | •                                   |                 |               |              |
| L055A               | M          | 51                 | 3 14:35                        | 2.137                                    | •                                   |                 |               |              |
| L055B               | M          | 51                 | 2 23:23                        | 2.107                                    | •                                   |                 |               |              |
| L056A               | M          | 50                 | 2 14:02                        | 2.323                                    | •                                   |                 |               |              |
| L056B               | M          | 50                 | 2 16:16                        | 2.353                                    | •                                   |                 |               |              |
| L057A               | M          | 58                 | 2 04:46                        | 2.011                                    |                                     |                 |               | •            |
| L057B               | M          | 58                 | 2 06:28                        | 2.081                                    | •                                   |                 |               |              |
| L058A               | M          | 63                 | 1 19:47                        | 1.816                                    |                                     | •               |               |              |
| L058B               | M          | 63                 | 2 21:12                        | –                                        |                                     |                 | •             |              |
| L059A               | F          | 41                 | 2 07:12                        | 1.913                                    |                                     | •               |               |              |
| L059B               | F          | 41                 | 3 06:25                        | 1.938                                    |                                     | •               |               |              |
