# Supplementary material for: Shear modulus data for the human lens determined from a spinning lens test
Source: PubMed Central journal article supplement (PMC3405528; doi:10.1016/j.exer.2012.01.011), 2012-04
Supplement: mmc3.pdf [file mmc3.pdf]

**Table S.3** – Stiffness parameters for lenses of set  $\mathcal{G}$  calculated from test B (1000 rpm) using support constraint F. If this is the preferred constraint for a given lens it is marked in that column.

|       | model H            | model D            |                    | model E            |                    | preferred constraint |
|-------|--------------------|--------------------|--------------------|--------------------|--------------------|----------------------|
|       | $G$ (Pa)           | $G_N$ (Pa)         | $G_C$ (Pa)         | $G_0$ (Pa)         | $G_1$ (Pa)         |                      |
| L021A | $7.52 \times 10^2$ | $4.11 \times 10^2$ | $1.21 \times 10^3$ | $1.71 \times 10^2$ | $1.51 \times 10^3$ |                      |
| L022B | $1.80 \times 10^2$ | $7.40 \times 10^1$ | $4.15 \times 10^2$ | $3.02 \times 10^1$ | $4.45 \times 10^2$ | •                    |
| L027A | $1.06 \times 10^3$ | $7.54 \times 10^2$ | $1.47 \times 10^3$ | $4.34 \times 10^2$ | $1.65 \times 10^3$ |                      |
| L027B | $9.04 \times 10^2$ | $7.46 \times 10^2$ | $1.17 \times 10^3$ | $4.72 \times 10^2$ | $1.34 \times 10^3$ |                      |
| L029A | $2.06 \times 10^3$ | $3.30 \times 10^3$ | $9.77 \times 10^2$ | $1.22 \times 10^4$ | $6.21 \times 10^2$ |                      |
| L029B | $2.28 \times 10^3$ | $3.07 \times 10^3$ | $1.53 \times 10^3$ | $5.69 \times 10^3$ | $1.31 \times 10^3$ |                      |
| L030B | $3.30 \times 10^3$ | $8.41 \times 10^3$ | $1.07 \times 10^3$ | $1.34 \times 10^5$ | $3.30 \times 10^2$ |                      |
| L033A | $1.49 \times 10^2$ | $5.88 \times 10^1$ | $2.70 \times 10^2$ | $1.42 \times 10^1$ | $3.67 \times 10^2$ | •                    |
| L037A | $1.80 \times 10^2$ | $6.44 \times 10^1$ | $3.50 \times 10^2$ | $7.41 \times 10^0$ | $5.38 \times 10^2$ | •                    |
| L038A | $4.37 \times 10^2$ | $8.89 \times 10^1$ | $9.77 \times 10^2$ | $1.97 \times 10^1$ | $1.55 \times 10^3$ |                      |
| L039B | $1.22 \times 10^3$ | $1.09 \times 10^3$ | $1.42 \times 10^3$ | $8.81 \times 10^2$ | $1.52 \times 10^3$ |                      |
| L040A | $1.76 \times 10^2$ | $7.05 \times 10^1$ | $3.86 \times 10^2$ | $1.60 \times 10^1$ | $5.16 \times 10^2$ | •                    |
| L040B | $1.85 \times 10^2$ | $5.50 \times 10^1$ | $3.90 \times 10^2$ | $8.79 \times 10^0$ | $5.91 \times 10^2$ | •                    |
| L043A | $1.62 \times 10^2$ | $6.43 \times 10^1$ | $2.68 \times 10^2$ | $9.93 \times 10^0$ | $4.26 \times 10^2$ | •                    |
| L043B | $1.46 \times 10^2$ | $4.52 \times 10^1$ | $2.82 \times 10^2$ | $8.26 \times 10^0$ | $4.17 \times 10^2$ | •                    |
| L044B | $8.72 \times 10^2$ | $4.14 \times 10^2$ | $1.66 \times 10^3$ | $1.45 \times 10^2$ | $2.13 \times 10^3$ |                      |
| L047B | $1.25 \times 10^3$ | $7.83 \times 10^2$ | $1.97 \times 10^3$ | $3.87 \times 10^2$ | $2.33 \times 10^3$ |                      |
| L050A | $2.26 \times 10^3$ | $2.73 \times 10^3$ | $1.74 \times 10^3$ | $3.72 \times 10^3$ | $1.63 \times 10^3$ |                      |
| L050B | $2.19 \times 10^3$ | $2.69 \times 10^3$ | $1.58 \times 10^3$ | $3.79 \times 10^3$ | $1.51 \times 10^3$ |                      |
| L051A | $6.71 \times 10^2$ | $3.77 \times 10^2$ | $1.15 \times 10^3$ | $1.68 \times 10^2$ | $1.35 \times 10^3$ |                      |
| L052B | $4.52 \times 10^2$ | $1.14 \times 10^2$ | $9.87 \times 10^2$ | $2.76 \times 10^1$ | $1.52 \times 10^3$ |                      |
| L053A | $3.02 \times 10^3$ | $1.38 \times 10^4$ | $8.61 \times 10^2$ | $1.55 \times 10^5$ | $3.36 \times 10^2$ |                      |
| L054A | $2.81 \times 10^3$ | $3.63 \times 10^3$ | $1.90 \times 10^3$ | $5.47 \times 10^3$ | $1.73 \times 10^3$ |                      |
| L054B | $2.71 \times 10^3$ | $4.71 \times 10^3$ | $1.48 \times 10^3$ | $1.02 \times 10^4$ | $1.21 \times 10^3$ |                      |
| L055A | $1.98 \times 10^3$ | $3.59 \times 10^3$ | $8.47 \times 10^2$ | $1.13 \times 10^4$ | $6.28 \times 10^2$ |                      |
| L055B | $1.94 \times 10^3$ | $3.58 \times 10^3$ | $8.99 \times 10^2$ | $1.11 \times 10^4$ | $6.82 \times 10^2$ |                      |
| L056A | $3.31 \times 10^3$ | $6.03 \times 10^3$ | $1.19 \times 10^3$ | $3.61 \times 10^4$ | $6.97 \times 10^2$ |                      |
| L056B | $3.19 \times 10^3$ | $6.60 \times 10^3$ | $1.06 \times 10^3$ | $3.90 \times 10^4$ | $6.42 \times 10^2$ |                      |
| L057B | $3.64 \times 10^3$ | $7.29 \times 10^3$ | $1.16 \times 10^3$ | $3.90 \times 10^4$ | $7.43 \times 10^2$ |                      |

Generated on the 25th of February 2012.

**Table S.4** – Stiffness parameters calculated for some lenses of set  $\mathcal{G}$  from test A (700 rpm) using support constraint F. If this is the preferred constraint for a given lens it is marked in that column.

|       | model H            | model D            |                    | model E            |                    | preferred constraint |
|-------|--------------------|--------------------|--------------------|--------------------|--------------------|----------------------|
|       | $G$ (Pa)           | $G_N$ (Pa)         | $G_C$ (Pa)         | $G_0$ (Pa)         | $G_1$ (Pa)         |                      |
| L022B | $1.54 \times 10^2$ | $5.42 \times 10^1$ | $2.93 \times 10^2$ | $6.08 \times 10^0$ | $5.77 \times 10^2$ | •                    |
| L033A | $1.31 \times 10^2$ | $5.24 \times 10^1$ | $2.45 \times 10^2$ | $1.13 \times 10^1$ | $3.54 \times 10^2$ | •                    |
| L037A | $1.45 \times 10^2$ | $4.39 \times 10^1$ | $2.81 \times 10^2$ | $5.04 \times 10^0$ | $4.12 \times 10^2$ | •                    |
| L038A | $2.97 \times 10^2$ | $8.79 \times 10^1$ | $7.99 \times 10^2$ | $2.54 \times 10^1$ | $1.09 \times 10^3$ |                      |
| L040A | $1.69 \times 10^2$ | $5.68 \times 10^1$ | $3.36 \times 10^2$ | $7.56 \times 10^0$ | $5.37 \times 10^2$ | •                    |
| L040B | $1.66 \times 10^2$ | $4.78 \times 10^1$ | $3.19 \times 10^2$ | $6.34 \times 10^0$ | $5.08 \times 10^2$ | •                    |
| L043A | $1.28 \times 10^2$ | $3.93 \times 10^1$ | $2.55 \times 10^2$ | $9.30 \times 10^0$ | $3.19 \times 10^2$ | •                    |
| L043B | $1.19 \times 10^2$ | $4.21 \times 10^1$ | $2.33 \times 10^2$ | $8.89 \times 10^0$ | $3.32 \times 10^2$ | •                    |
| L052B | $2.92 \times 10^2$ | $5.78 \times 10^0$ | $1.22 \times 10^3$ | $1.90 \times 10^1$ | $1.18 \times 10^3$ |                      |

**Table S.5** – Stiffness parameters calculated for some lenses of set  $\mathcal{G}$  from test C (1400 rpm) using support constraint F. If this is the preferred constraint for a given lens it is marked in that column.

|       | model H            | model D            |                    | model E            |                    | preferred constraint |
|-------|--------------------|--------------------|--------------------|--------------------|--------------------|----------------------|
|       | $G$ (Pa)           | $G_N$ (Pa)         | $G_C$ (Pa)         | $G_0$ (Pa)         | $G_1$ (Pa)         |                      |
| L029A | $2.17 \times 10^3$ | $2.96 \times 10^3$ | $1.30 \times 10^3$ | $8.79 \times 10^3$ | $8.92 \times 10^2$ |                      |
| L029B | $2.21 \times 10^3$ | $2.90 \times 10^3$ | $1.44 \times 10^3$ | $5.09 \times 10^3$ | $1.27 \times 10^3$ |                      |
| L030B | $3.95 \times 10^3$ | $7.14 \times 10^3$ | $1.35 \times 10^3$ | $5.76 \times 10^5$ | $2.20 \times 10^2$ |                      |
| L047B | $1.27 \times 10^3$ | $7.46 \times 10^2$ | $2.13 \times 10^3$ | $3.17 \times 10^2$ | $2.65 \times 10^3$ |                      |
| L050A | $2.41 \times 10^3$ | $2.99 \times 10^3$ | $1.64 \times 10^3$ | $4.47 \times 10^3$ | $1.55 \times 10^3$ |                      |
| L050B | $2.33 \times 10^3$ | $2.67 \times 10^3$ | $1.86 \times 10^3$ | $3.30 \times 10^3$ | $1.83 \times 10^3$ |                      |
| L051A | $7.67 \times 10^2$ | $4.09 \times 10^2$ | $1.38 \times 10^3$ | $1.62 \times 10^2$ | $1.70 \times 10^3$ |                      |
| L053A | $2.96 \times 10^3$ | $1.35 \times 10^4$ | $8.56 \times 10^2$ | $1.53 \times 10^5$ | $3.31 \times 10^2$ |                      |
| L054A | $2.71 \times 10^3$ | $4.33 \times 10^3$ | $1.44 \times 10^3$ | $9.77 \times 10^3$ | $1.15 \times 10^3$ |                      |
| L054B | $2.88 \times 10^3$ | $5.68 \times 10^3$ | $1.45 \times 10^3$ | $1.35 \times 10^4$ | $1.16 \times 10^3$ |                      |
| L055A | $2.10 \times 10^3$ | $3.92 \times 10^3$ | $8.86 \times 10^2$ | $1.33 \times 10^4$ | $6.38 \times 10^2$ |                      |
| L055B | $2.12 \times 10^3$ | $3.98 \times 10^3$ | $9.36 \times 10^2$ | $1.29 \times 10^4$ | $6.99 \times 10^2$ |                      |
| L056A | $3.48 \times 10^3$ | $6.02 \times 10^3$ | $1.15 \times 10^3$ | $3.49 \times 10^4$ | $7.18 \times 10^2$ |                      |
| L056B | $3.36 \times 10^3$ | $6.32 \times 10^3$ | $1.18 \times 10^3$ | $3.33 \times 10^4$ | $7.58 \times 10^2$ |                      |
| L057B | $3.67 \times 10^3$ | $7.55 \times 10^3$ | $1.20 \times 10^3$ | $4.98 \times 10^4$ | $6.86 \times 10^2$ |                      |

**Table S.6** – Stiffness parameters for lenses of set  $\mathcal{G}$  calculated from test B (1000 rpm) using support constraint S. If this is the preferred constraint for a given lens it is marked in that column.

|       | model H            | model D            |                    | model E            |                    | preferred constraint |
|-------|--------------------|--------------------|--------------------|--------------------|--------------------|----------------------|
|       | $G$ (Pa)           | $G_N$ (Pa)         | $G_C$ (Pa)         | $G_0$ (Pa)         | $G_1$ (Pa)         |                      |
| L021A | $8.11 \times 10^2$ | $6.53 \times 10^2$ | $1.06 \times 10^3$ | $4.65 \times 10^2$ | $1.15 \times 10^3$ | •                    |
| L022B | $2.38 \times 10^2$ | $2.02 \times 10^2$ | $3.27 \times 10^2$ | $1.80 \times 10^2$ | $2.98 \times 10^2$ |                      |
| L027A | $1.13 \times 10^3$ | $1.08 \times 10^3$ | $1.26 \times 10^3$ | $9.77 \times 10^2$ | $1.28 \times 10^3$ | •                    |
| L027B | $1.01 \times 10^3$ | $9.50 \times 10^2$ | $1.12 \times 10^3$ | $8.72 \times 10^2$ | $1.11 \times 10^3$ | •                    |
| L029A | $2.17 \times 10^3$ | $4.02 \times 10^3$ | $8.98 \times 10^2$ | $1.74 \times 10^4$ | $5.53 \times 10^2$ | •                    |
| L029B | $2.50 \times 10^3$ | $3.70 \times 10^3$ | $1.37 \times 10^3$ | $8.84 \times 10^3$ | $1.09 \times 10^3$ | •                    |
| L030B | $3.55 \times 10^3$ | $9.59 \times 10^3$ | $1.03 \times 10^3$ | $1.41 \times 10^5$ | $3.30 \times 10^2$ | •                    |
| L033A | $1.80 \times 10^2$ | $2.02 \times 10^2$ | $1.57 \times 10^2$ | $3.23 \times 10^2$ | $1.38 \times 10^2$ |                      |
| L037A | $2.21 \times 10^2$ | $2.11 \times 10^2$ | $2.36 \times 10^2$ | $2.79 \times 10^2$ | $1.95 \times 10^2$ |                      |
| L038A | $4.75 \times 10^2$ | $1.92 \times 10^2$ | $9.33 \times 10^2$ | $6.19 \times 10^1$ | $1.27 \times 10^3$ | •                    |
| L039B | $1.33 \times 10^3$ | $1.28 \times 10^3$ | $1.41 \times 10^3$ | $1.23 \times 10^3$ | $1.40 \times 10^3$ | •                    |
| L040A | $2.41 \times 10^2$ | $1.91 \times 10^2$ | $3.16 \times 10^2$ | $1.67 \times 10^2$ | $2.92 \times 10^2$ |                      |
| L040B | $2.30 \times 10^2$ | $1.96 \times 10^2$ | $2.72 \times 10^2$ | $2.19 \times 10^2$ | $2.54 \times 10^2$ |                      |
| L043A | $1.87 \times 10^2$ | $2.16 \times 10^2$ | $1.57 \times 10^2$ | $3.70 \times 10^2$ | $1.36 \times 10^2$ |                      |
| L043B | $1.79 \times 10^2$ | $2.18 \times 10^2$ | $1.36 \times 10^2$ | $3.63 \times 10^2$ | $1.28 \times 10^2$ |                      |
| L044B | $9.45 \times 10^2$ | $7.34 \times 10^2$ | $1.40 \times 10^3$ | $5.13 \times 10^2$ | $1.46 \times 10^3$ | •                    |
| L047B | $1.34 \times 10^3$ | $1.10 \times 10^3$ | $1.76 \times 10^3$ | $7.13 \times 10^2$ | $1.99 \times 10^3$ | •                    |
| L050A | $2.55 \times 10^3$ | $3.34 \times 10^3$ | $1.53 \times 10^3$ | $5.87 \times 10^3$ | $1.36 \times 10^3$ | •                    |
| L050B | $2.36 \times 10^3$ | $3.25 \times 10^3$ | $1.38 \times 10^3$ | $6.05 \times 10^3$ | $1.22 \times 10^3$ | •                    |
| L051A | $7.14 \times 10^2$ | $5.13 \times 10^2$ | $1.11 \times 10^3$ | $3.01 \times 10^2$ | $1.20 \times 10^3$ | •                    |
| L052B | $4.81 \times 10^2$ | $2.29 \times 10^2$ | $9.30 \times 10^2$ | $8.28 \times 10^1$ | $1.23 \times 10^3$ | •                    |
| L053A | $3.50 \times 10^3$ | $1.84 \times 10^4$ | $8.30 \times 10^2$ | $2.01 \times 10^5$ | $3.13 \times 10^2$ | •                    |
| L054A | $3.02 \times 10^3$ | $4.45 \times 10^3$ | $1.63 \times 10^3$ | $8.41 \times 10^3$ | $1.42 \times 10^3$ | •                    |
| L054B | $2.89 \times 10^3$ | $6.04 \times 10^3$ | $1.29 \times 10^3$ | $1.57 \times 10^4$ | $9.97 \times 10^2$ | •                    |
| L055A | $2.14 \times 10^3$ | $4.27 \times 10^3$ | $7.96 \times 10^2$ | $1.48 \times 10^4$ | $5.74 \times 10^2$ | •                    |
| L055B | $2.08 \times 10^3$ | $4.06 \times 10^3$ | $8.60 \times 10^2$ | $1.56 \times 10^4$ | $5.95 \times 10^2$ | •                    |
| L056A | $3.61 \times 10^3$ | $7.23 \times 10^3$ | $1.10 \times 10^3$ | $5.31 \times 10^4$ | $6.15 \times 10^2$ | •                    |
| L056B | $3.57 \times 10^3$ | $7.48 \times 10^3$ | $1.07 \times 10^3$ | $5.96 \times 10^4$ | $5.54 \times 10^2$ | •                    |
| L057B | $3.98 \times 10^3$ | $8.19 \times 10^3$ | $1.12 \times 10^3$ | $5.16 \times 10^4$ | $6.76 \times 10^2$ | •                    |

**Table S.7** – Stiffness parameters calculated for some lenses of set  $\mathcal{G}$  from test A (700 rpm) using support constraint S. If this is the preferred constraint for a given lens it is marked in that column.

|       | model H            | model D            |                    | model E            |                    | preferred constraint |
|-------|--------------------|--------------------|--------------------|--------------------|--------------------|----------------------|
|       | $G$ (Pa)           | $G_N$ (Pa)         | $G_C$ (Pa)         | $G_0$ (Pa)         | $G_1$ (Pa)         |                      |
| L022B | $2.11 \times 10^2$ | $1.69 \times 10^2$ | $2.72 \times 10^2$ | $2.06 \times 10^2$ | $2.15 \times 10^2$ |                      |
| L033A | $1.56 \times 10^2$ | $1.92 \times 10^2$ | $1.13 \times 10^2$ | $3.38 \times 10^2$ | $1.07 \times 10^2$ |                      |
| L037A | $1.60 \times 10^2$ | $1.61 \times 10^2$ | $1.63 \times 10^2$ | $3.75 \times 10^2$ | $1.08 \times 10^2$ |                      |
| L038A | $3.47 \times 10^2$ | $1.77 \times 10^2$ | $8.27 \times 10^2$ | $9.13 \times 10^0$ | $1.93 \times 10^3$ | •                    |
| L040A | $1.98 \times 10^2$ | $1.56 \times 10^2$ | $2.63 \times 10^2$ | $1.47 \times 10^2$ | $2.27 \times 10^2$ |                      |
| L040B | $1.90 \times 10^2$ | $1.65 \times 10^2$ | $2.18 \times 10^2$ | $2.41 \times 10^2$ | $1.65 \times 10^2$ |                      |
| L043A | $1.41 \times 10^2$ | $1.77 \times 10^2$ | $1.06 \times 10^2$ | $5.00 \times 10^2$ | $7.96 \times 10^1$ |                      |
| L043B | $1.41 \times 10^2$ | $2.30 \times 10^2$ | $6.50 \times 10^1$ | $3.80 \times 10^2$ | $8.88 \times 10^1$ |                      |
| L052B | $3.53 \times 10^2$ | $2.12 \times 10^2$ | $8.32 \times 10^2$ | $4.68 \times 10^1$ | $1.36 \times 10^3$ | •                    |

**Table S.8** – Stiffness parameters calculated for some lenses of set  $\mathcal{G}$  from test C (1400 rpm) using support constraint S. If this is the preferred constraint for a given lens it is marked in that column.

|       | model H            | model D            |                    | model E            |                    | preferred constraint |
|-------|--------------------|--------------------|--------------------|--------------------|--------------------|----------------------|
|       | $G$ (Pa)           | $G_N$ (Pa)         | $G_C$ (Pa)         | $G_0$ (Pa)         | $G_1$ (Pa)         |                      |
| L029A | $2.38 \times 10^3$ | $3.39 \times 10^3$ | $1.19 \times 10^3$ | $1.51 \times 10^4$ | $7.03 \times 10^2$ | •                    |
| L029B | $2.39 \times 10^3$ | $3.58 \times 10^3$ | $1.26 \times 10^3$ | $8.06 \times 10^3$ | $1.04 \times 10^3$ | •                    |
| L030B | $4.35 \times 10^3$ | $8.26 \times 10^3$ | $1.29 \times 10^3$ | $1.03 \times 10^6$ | $1.81 \times 10^2$ | •                    |
| L047B | $1.35 \times 10^3$ | $9.35 \times 10^2$ | $2.21 \times 10^3$ | $5.01 \times 10^2$ | $2.57 \times 10^3$ | •                    |
| L050A | $2.65 \times 10^3$ | $3.56 \times 10^3$ | $1.46 \times 10^3$ | $6.68 \times 10^3$ | $1.31 \times 10^3$ | •                    |
| L050B | $2.55 \times 10^3$ | $3.26 \times 10^3$ | $1.61 \times 10^3$ | $5.32 \times 10^3$ | $1.49 \times 10^3$ | •                    |
| L051A | $8.23 \times 10^2$ | $5.36 \times 10^2$ | $1.43 \times 10^3$ | $2.82 \times 10^2$ | $1.60 \times 10^3$ | •                    |
| L053A | $3.19 \times 10^3$ | $1.77 \times 10^4$ | $8.28 \times 10^2$ | $2.09 \times 10^5$ | $3.02 \times 10^2$ | •                    |
| L054A | $2.89 \times 10^3$ | $5.32 \times 10^3$ | $1.27 \times 10^3$ | $1.32 \times 10^4$ | $1.04 \times 10^3$ | •                    |
| L054B | $3.10 \times 10^3$ | $7.00 \times 10^3$ | $1.33 \times 10^3$ | $1.90 \times 10^4$ | $1.01 \times 10^3$ | •                    |
| L055A | $2.28 \times 10^3$ | $4.62 \times 10^3$ | $8.38 \times 10^2$ | $1.72 \times 10^4$ | $5.86 \times 10^2$ | •                    |
| L055B | $2.32 \times 10^3$ | $4.50 \times 10^3$ | $9.06 \times 10^2$ | $1.69 \times 10^4$ | $6.38 \times 10^2$ | •                    |
| L056A | $3.86 \times 10^3$ | $6.41 \times 10^3$ | $1.14 \times 10^3$ | $5.80 \times 10^4$ | $5.92 \times 10^2$ | •                    |
| L056B | $3.74 \times 10^3$ | $7.35 \times 10^3$ | $1.16 \times 10^3$ | $4.99 \times 10^4$ | $6.64 \times 10^2$ | •                    |
| L057B | $4.04 \times 10^3$ | $8.84 \times 10^3$ | $1.14 \times 10^3$ | $7.73 \times 10^4$ | $5.88 \times 10^2$ | •                    |
